# Supplementary material
Source: PubMed Central journal article supplement (PMC3971372)

Stael et al. Supplemental figure 1

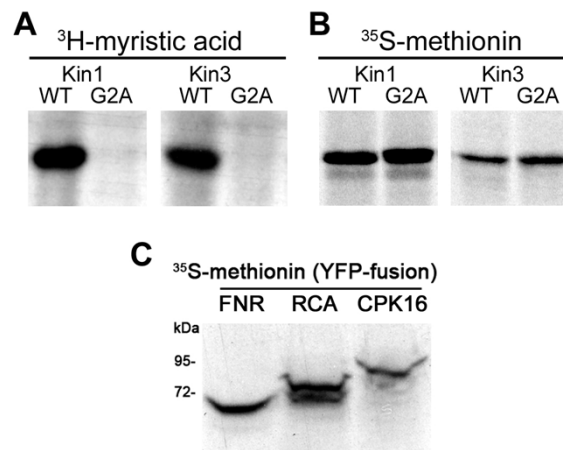

Stael et al. Supplemental figure 2

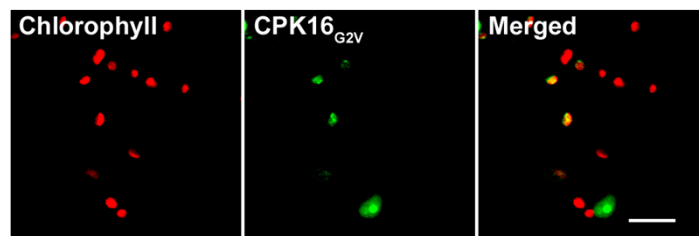

Supplement: NIHMS57723-supplement-Stael_et_al__2011_suppl__data.pdf [file NIHMS57723-supplement-Stael_et_al__2011_suppl__data.pdf]
